# Supplementary material
Source: publisher figshare collection journal article supplement (https://frontiersin.figshare.com/ndownloader/files/33849467)

Figure S1. Patient positioning and trocar placement for TRPN.

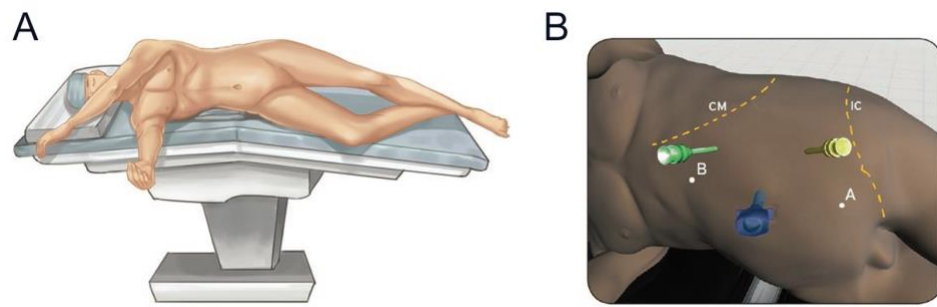

Figure S2. Patient positioning and trocar placement for RRPN.

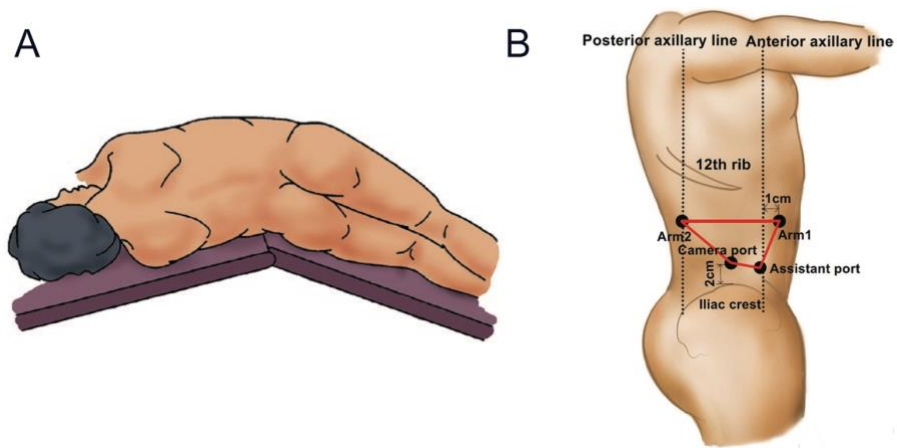

Supplement: Supplementary file [file 33849467]
